# Supplementary material for: GFOD1 and peejar are promising markers for clear-cell renal cell carcinoma disease progression
Source: PubMed Central journal article supplement (PMC5122367; doi:10.18632/oncotarget.9379), 2016-05-15
Supplement: oncotarget-07-38004-s001.pdf [file oncotarget-07-38004-s001.pdf]

## GFOD1 and peejar are promising markers for clear-cell renal cell carcinoma disease progression

### Supplementary Materials

#### Supplementary File S1: GFOD1 and peejar selection flow chart.

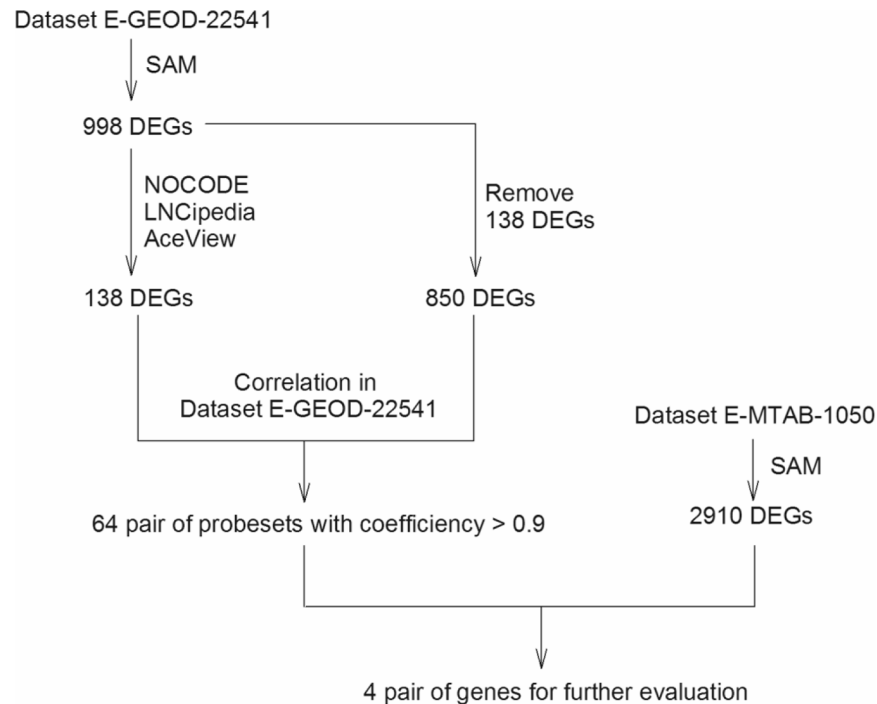

#### List of 4 pair of genes

|                                             | Annotation | Chromosome |                                             | Annotation | Chromosome |
|---------------------------------------------|------------|------------|---------------------------------------------|------------|------------|
| 201090_x_at;<br>211058_x_at;<br>213646_x_at | TUBA1B     | Ch12       | 209251_x_at;<br>211750_x_at;<br>212639_x_at | TUBA1C     | Ch12       |
| 219821_s_at                                 | GFOD1      | Ch6        | 230179_at                                   | peejar     | Ch6        |
| 231947_at                                   | MYCT1      | Ch6        | 213891_s_at                                 | TCF4       | Ch18       |
| 205326_at                                   | RAMP3      | Ch7        | 225809_at                                   | PARM1      | Ch4        |

Differential expression genes (DEGs) were identified from dataset E-GEOD-22541, using statistical analysis of microarrays (SAM method) at false discovery rate = 0.05, and standard fold change cutoff = 1.6. We aligned each probe sequence from totally 998 DEGs with three databases, including NOCODE, an integrated database for non-code RNA ([www.noncode.org](http://www.noncode.org)); LNCipedia, a resource for lncRNA transcripts ([www.lncipedia.org](http://www.lncipedia.org)); and AceView, a comprehensive sequence representation of all public RNA sequences including both coding and non-coding RNA (<http://www.ncbi.nlm.nih.gov/iebr/research/acembly/>). Totally 138 DEGs were supposed to mainly represented non-coding RNA, and residue 850 DEGs were mainly represented to coding RNA. There are 64 pairs of probesets, corresponding to non-coding or coding respectively, exhibited correlation coefficient superior to 0.9. Differential expression genes (DEGs) were identified from dataset E-MTAB-1050, using statistical analysis of microarrays (SAM method) at false discovery rate = 0.05, and standard fold change cutoff = 1.6. After overlapping the 64 pair of probesets and the 2910 DEGs, finally 4 pair of genes were selected for next step. GFOD1 and peejar were selected for further study, since they were located in the same chromosome, and there were only 186 bp distance between those two genes on their chromosome. Potentially GFOD1 gene and peejar gene were transcriptional coupling neighboring genes.

**Supplementary File S2: Quality control microarray datasets.** MAplot and histogram were used for analysis processing quality control. Generally speaking, the arrays downloaded from dataset E-GEOD-22541 and dataset E-GEOD-1050 were performed with high quality and the RMA algorithm is ok for data analysis. We performed MAplot comparison before and after normalization. The demonstrative comparison figures were presented below

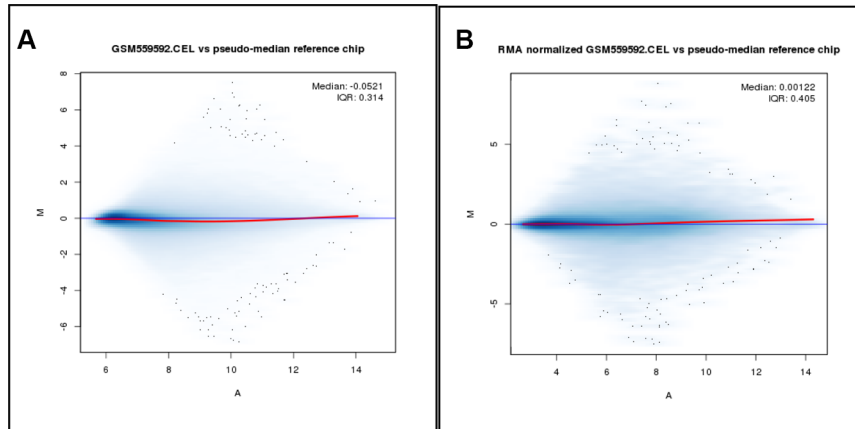

MAplot for array number GSM59592.CEL, before normalization (A) and after normalization (B).

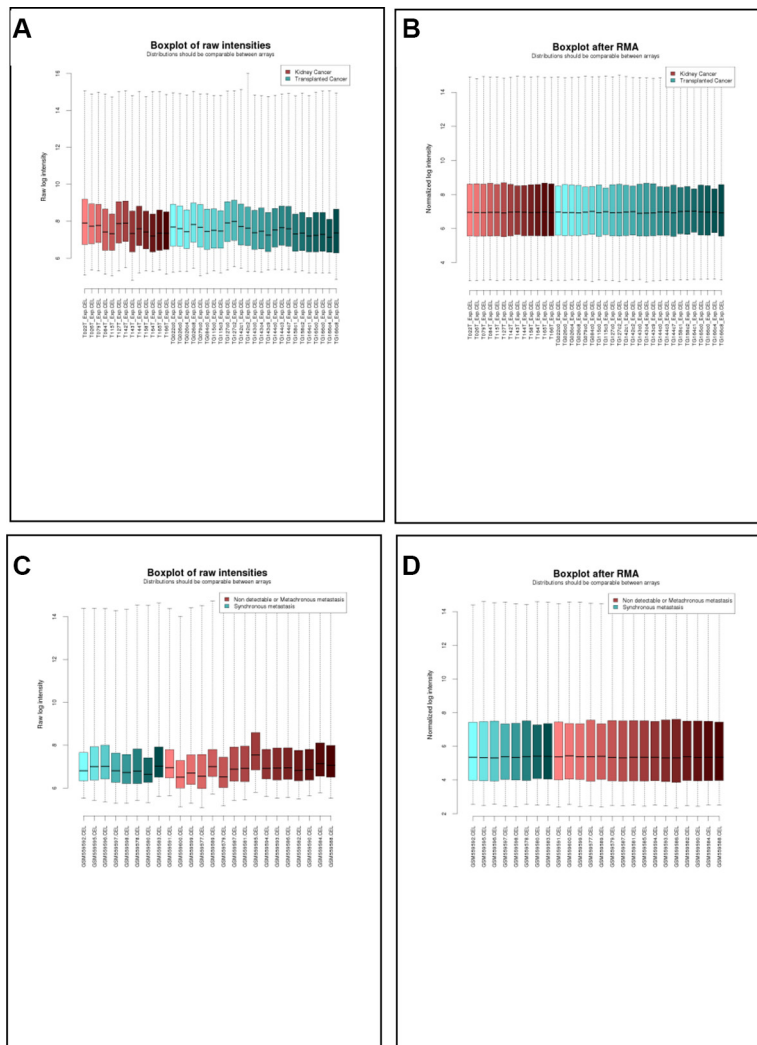

Histogram for dataset E-GEOD-1050 (A and B) and dataset E-GEOD-22541 (C and D), before normalization (A and C) and after normalization (B and D), to indicate the efficiency of RMA normalization.

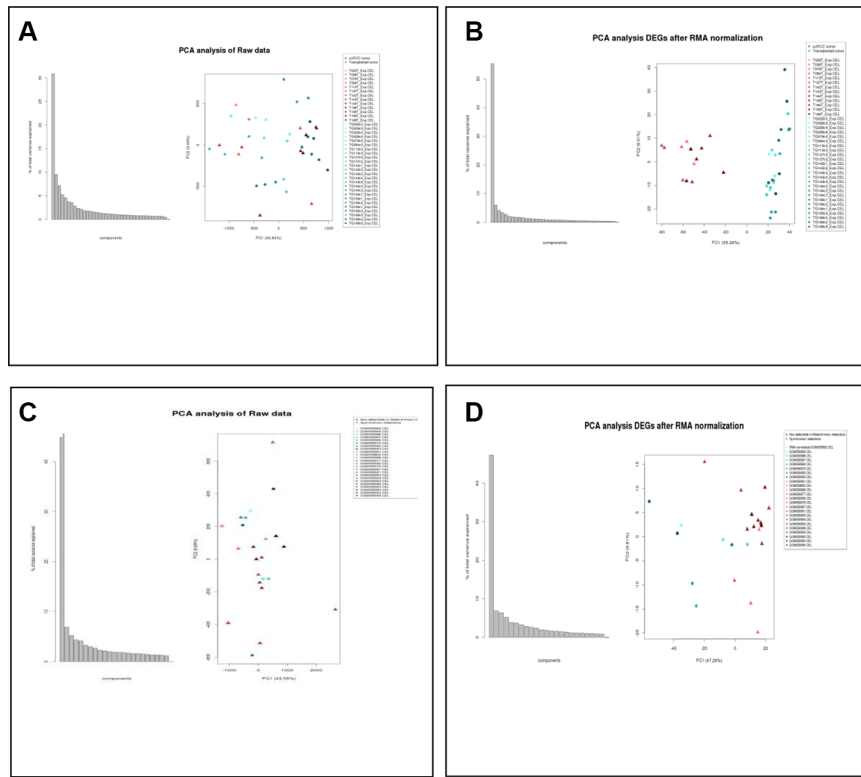

PCA analysis for raw data and selected DEGs, for dataset E-GEOD-1050 (A and B) and E-GEOD-22541 (C and D), using whole data (A and C) or selected differentially expressing genes (B and D).

### Supplementary File S3: Clinical information of the ccRCC patients

| ccRCC Patients | Gender | Age (year) | Furhman Grade | T Stage (TNM) | Clinical Stage |
|----------------|--------|------------|---------------|---------------|----------------|
| T01            | Male   | 68         | IV            | 1B            | 1              |
| T02            | Male   | 60         | III           | 1B            | 1              |
| T03            | Male   | 78         | III           | 1B            | 1              |
| T04            | Female | 34         | III           | 1A            | 1              |
| T05            | Female | 70         | III           | 1A            | 1              |
| T06            | Male   | 53         | III           | 1A            | 1              |
| T07            | Male   | 60         | III           | 1A            | 1              |
| T08            | Male   | 61         | III           | 3A            | 3              |
| T09            | Female | 30         | III           | 2A            | 2              |
| T10            | Male   | 48         | III           | 1A            | 1              |
| T11            | Male   | 67         | III           | 3B            | 3              |
| T12            | Male   | 52         | III           | 1A            | 1              |
| T13            | Male   | 59         | III           | 1B            | 1              |
| T14            | Male   | 88         | III           | 1A            | 1              |
| T15            | Male   | 57         | III           | 2A            | 2              |
| T16            | Male   | 62         | II            | 1B            | 1              |
| T17            | Male   | 61         | II            | 3A            | 3              |
| T18            | Female | 71         | II            | 1B            | 1              |
| T19            | Female | 45         | II            | 1B            | 1              |

|     |        |    |     |    |   |
|-----|--------|----|-----|----|---|
| T20 | Male   | 58 | II  | 1B | 1 |
| T21 | Male   | 63 | II  | 2A | 2 |
| T22 | Female | 57 | II  | 2A | 2 |
| T23 | Female | 52 | II  | 2A | 2 |
| T24 | Male   | 47 | II  | 1B | 1 |
| T25 | Male   | 59 | II  | 2B | 2 |
| T26 | Male   | 69 | II  | 1B | 1 |
| T27 | Male   | 65 | II  | 1B | 1 |
| T28 | Female | 84 | II  | 1B | 1 |
| T29 | Male   | 57 | II  | 2A | 2 |
| T30 | Male   | 56 | I   | 3A | 3 |
| T31 | Male   | 58 | I   | 1B | 1 |
| T32 | Male   | 36 | I   | 1A | 1 |
| T33 | Female | 45 | I   | 1B | 1 |
| T34 | Male   | 40 | I   | 1B | 1 |
| T35 | Male   | 41 | I   | 1B | 1 |
| T36 | Male   | 47 | I   | 1B | 1 |
| T37 | Male   | 58 | I   | 1A | 1 |
| T38 | Female | 56 | I   | 1A | 1 |
| T39 | Female | 52 | I   | 1A | 1 |
| T40 | Female | 66 | II  | 1B | 1 |
| T41 | Male   | 65 | II  | 1B | 1 |
| T42 | Female | 61 | IV  | 2B | 3 |
| T43 | Male   | 59 | II  | 2a | 3 |
| T44 | Male   | 74 | III | 2A | 2 |
| T45 | Male   | 61 | II  | 2A | 2 |
| T46 | Female | 79 | II  | 1A | 1 |
| T47 | Male   | 61 | II  | 1A | 1 |
| T48 | Male   | 48 | II  | 1A | 1 |
| T49 | Female | 63 | II  | 1A | 1 |
| T50 | Female | 56 | II  | 1A | 1 |

#### Supplementary File S4: Primer sequences for the targets and reference genes

|        | Primer 1                 | Primer 2               |
|--------|--------------------------|------------------------|
| peejar | ACTTACTTGTGATTCTTGGTCTAA | GCAAAGGAATGGGTCAGAT    |
| GFOD1  | GCCTTCAGTTCCAATCAG       | ATAATGTTCCCTTGTTGTCCTT |
| HMBS   | ATACAGCTATGAAGGATGG      | AGTGATGCCTACCAACTG     |
| PPIA   | GGCATGAATATTGTGGAG       | GGAATGATCTGGTGGTTA     |
| ATP5J  | CATTGGTGTTACAGCAGTG      | CAACAGGTCCTCCAGATG     |
| TBP    | CAGTGAATCTTGGTTGTAA      | TGGCTCTCTTATCCTCAT     |

**Supplementary File S5: Top 15 enriched GO terms of DEGs identified from dataset E-GEOD-22541**

| <b>GO ID</b> | <b>GO annotation</b>                                                                 | <b>p-value</b> |
|--------------|--------------------------------------------------------------------------------------|----------------|
| GO:0008380   | RNA splicing                                                                         | 1.10E-09       |
| GO:0006397   | mRNA processing                                                                      | 3.86E-08       |
| GO:0016071   | mRNA metabolic process                                                               | 7.57E-08       |
| GO:0006396   | RNA processing                                                                       | 1.78E-07       |
| GO:0044260   | cellular macromolecule metabolic process                                             | 4.84E-07       |
| GO:0034641   | cellular nitrogen compound metabolic process                                         | 4.41E-06       |
| GO:0000377   | RNA splicing, via transesterification reactions with bulged adenosine as nucleophile | 5.38E-06       |
| GO:0000398   | nuclear mRNA splicing, via spliceosome                                               | 5.38E-06       |
| GO:0000375   | RNA splicing, via transesterification reactions                                      | 5.38E-06       |
| GO:0006139   | nucleobase, nucleoside, nucleotide and nucleic acid metabolic process                | 6.66E-06       |
| GO:0006807   | nitrogen compound metabolic process                                                  | 7.32E-06       |
| GO:0016070   | RNA metabolic process                                                                | 1.41E-05       |
| GO:0043170   | macromolecule metabolic process                                                      | 4.89E-05       |
| GO:0000280   | nuclear division                                                                     | 5.18E-05       |
| GO:0007067   | Mitosis                                                                              | 5.18E-05       |

**Supplementary File S6: Top 15 enriched GO terms of DEGs identified from dataset E-MTAB-1050**

| <b>GO ID</b> | <b>GO annotation</b>                             | <b>p-value</b> |
|--------------|--------------------------------------------------|----------------|
| GO:0002376   | immune system process                            | 1.61E-44       |
| GO:0006955   | immune response                                  | 6.85E-39       |
| GO:0006952   | defense response                                 | 1.93E-20       |
| GO:0002682   | regulation of immune system process              | 6.07E-18       |
| GO:0050896   | response to stimulus                             | 1.57E-17       |
| GO:0002684   | positive regulation of immune system process     | 3.46E-15       |
| GO:0001775   | cell activation                                  | 7.75E-15       |
| GO:0007165   | signal transduction                              | 1.97E-14       |
| GO:0045321   | leukocyte activation                             | 6.08E-14       |
| GO:0050776   | regulation of immune response                    | 9.56E-14       |
| GO:0007166   | cell surface receptor linked signal transduction | 1.30E-13       |
| GO:0006954   | inflammatory response                            | 1.41E-13       |
| GO:0009611   | response to wounding                             | 9.03E-13       |
| GO:0046649   | lymphocyte activation                            | 1.78E-12       |
| GO:0050865   | regulation of cell activation                    | 2.05E-12       |

**Supplementary File S7: KEGG pathway analysis of DEGs identified from dataset E-MTAB-1050.**

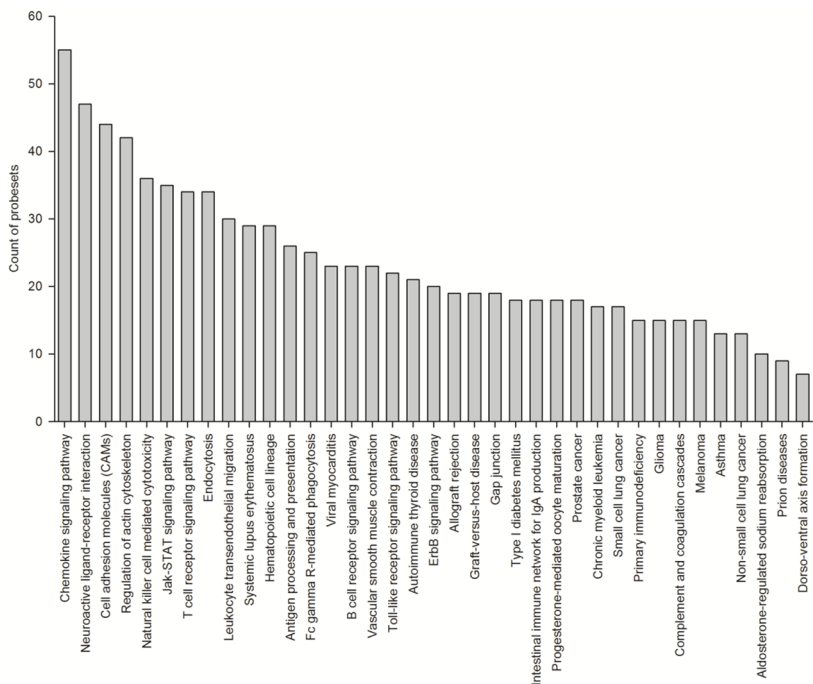

The data exhibited are significantly enriched with immune cell mediated signal pathways.

**Supplementary File S8: Tumor infiltrated immune cells might contributed to both GFOD1 and peejar expression.**

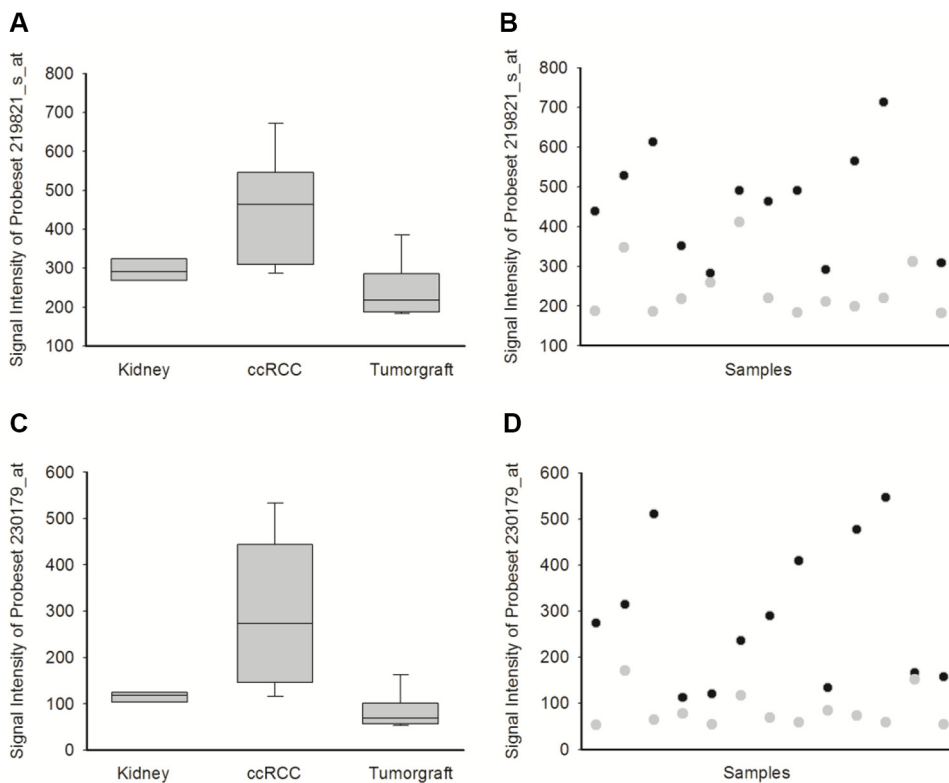

Probeset signal intensity extracted from dataset E-MTAB-1050. Both probeset 219821\_s\_at (GFOD1) and probeset 230179\_at (peejar) shown some expression in normal kidney samples, and such expression were significantly elevated in ccRCC tumor samples, but reduced to significantly lower level expression in tumor Xenograft samples (A and C). The paired comparison between ccRCC tumor and xenograft samples were shown in B (GFOD1) and D (peejar), exhibited distinct difference in most samples.

**Supplementary File S9: Both Eosinophils and NK cells were positive for GFOD1 and peejar in blood samples.**

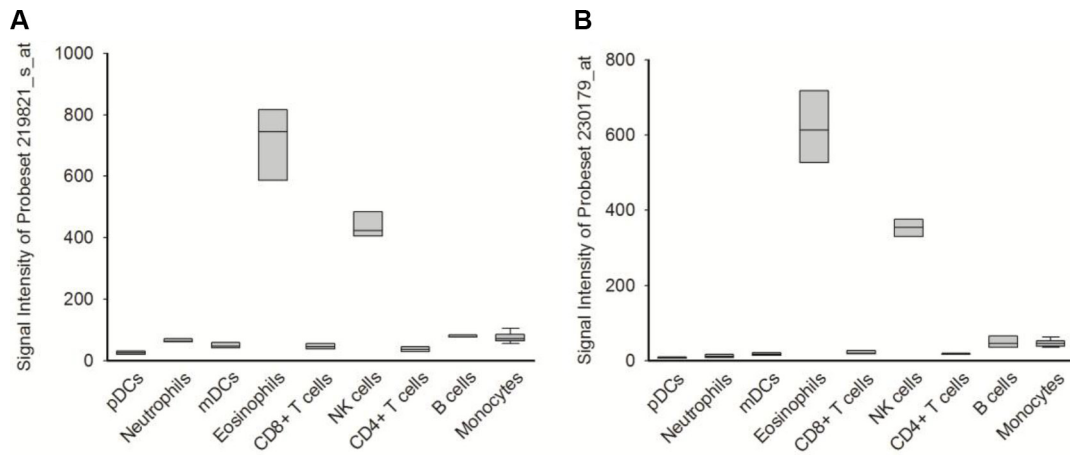

Probeset signal intensity extracted from dataset E-GEOD-28490. Both probeset 219821\_s\_at (GFOD1) and probeset 230179\_at (peejar) shown high expression level in Eosinophils and NK cells, but relatively weak expression in other cells, like pDCs, neutrophils, mDCs, CD8+ T cell, CD4+ T cells, B cells and monocytes. Tumor micro environment also enriched with macrophages, and a sub group of microphage might be also positive for GFOD1 and peejar.

**Supplementary Dataset S1: Differentially expressed genes from E-GEOD-22541 dataset were identified using the significance analysis of microarrays method. See Supplementary\_Dataset\_S1**

**Supplementary Dataset S2: 138 DEGs was selected after compare 998 DEGs with three different non coding RNA databases. See Supplementary\_Dataset\_S2**

**Supplementary Dataset S3: The gene expression correlation between 138 DEGs (non-coding RNAs) and 850 DEGs (coding RNAs). See Supplementary\_Dataset\_S3**

**Supplementary Dataset S4: 64 pair of probesets with correlation coefficient > 0.9. See Supplementary\_Dataset\_S4**

**Supplementary Dataset S5: Differentially expressed genes from E-MTAB-1050 dataset were identified using the significance analysis of microarrays method. See Supplementary\_Dataset\_S5**
